# Supplementary material for: Use of estetrol with other steroids for attenuation of neonatal hypoxic-Ischemic brain injury: to combine or not to combine?
Source: PubMed Central journal article supplement (PMC5085115; doi:10.18632/oncotarget.9591), 2016-05-26
Supplement: oncotarget-07-33722-s001.pdf [file oncotarget-07-33722-s001.pdf]

# Use of Estetrol with other Steroids for Attenuation of Neonatal Hypoxic-Ischemic brain injury: to combine or not to combine?

## Supplementary Material

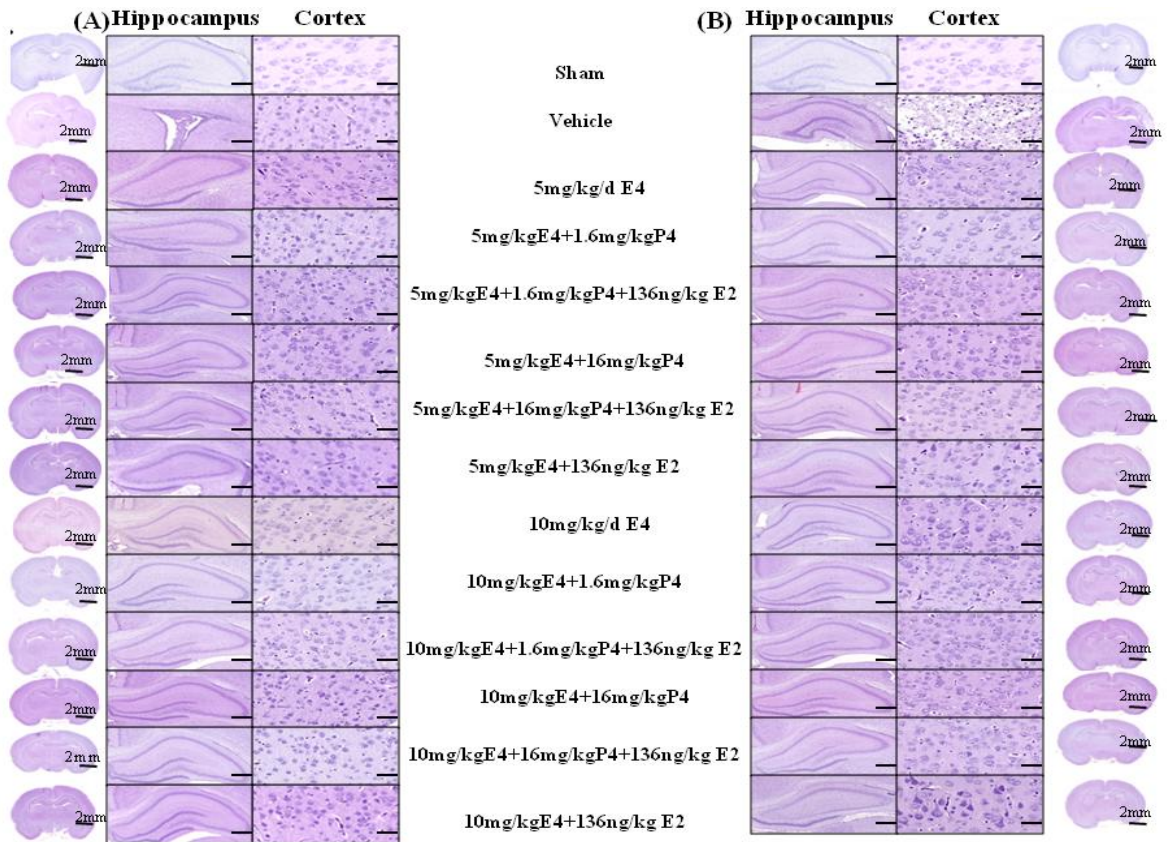

**Supplementary Figure 1. Representative views of Hematoxylin-eosin-stained brain coronal sections from rat pups pretreated/treated by E4 alone or in combination with P4 and/or E2.**

Paraffin embedded brain samples were sliced into 5  $\mu$ m-thick coronal sections at the hippocampus level. Sections were deparaffinized and rehydrated and hematoxylin and eosin staining was performed. Brain coronal sections (Scale bar: 2mm) with hippocampus region

(Scale bar: 500 $\mu$ m), and the cortex (Scale bar: 100 $\mu$ m) from pretreated (A) and treated (B) study groups are presented.

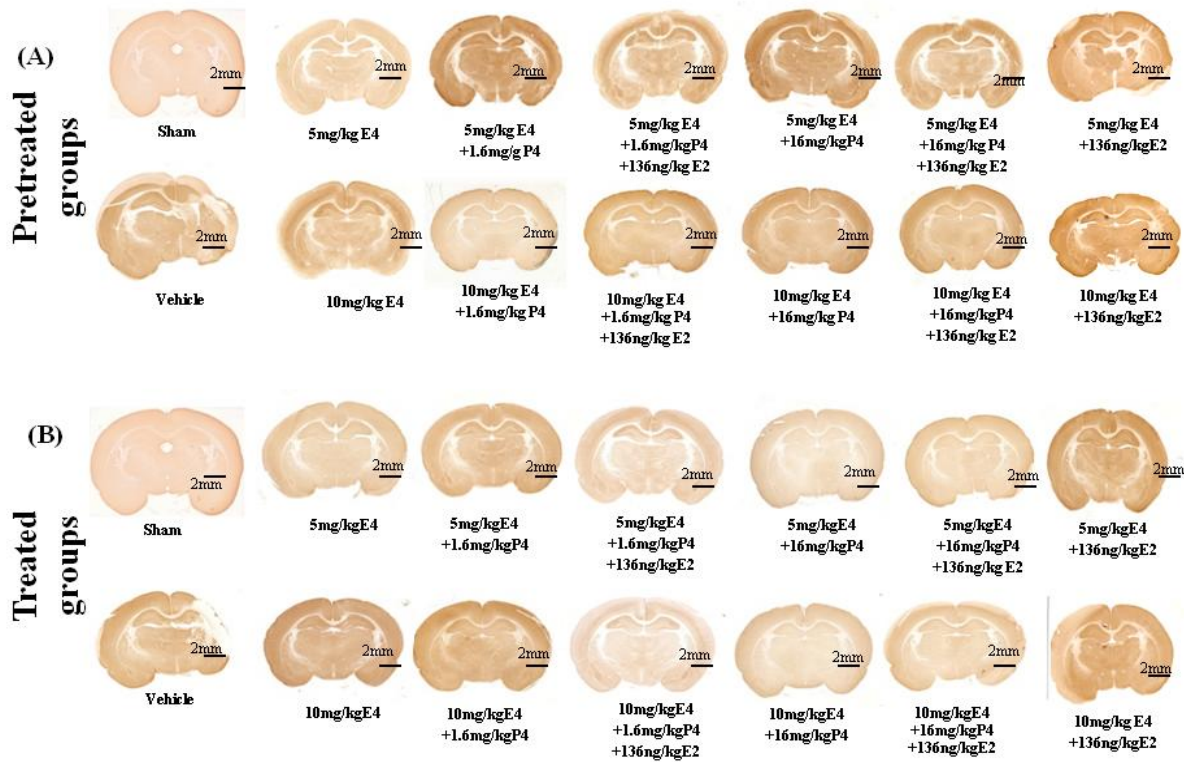

**Supplementary Figure 2. Representative views of MAP2-stained coronal brain sections from groups pretreated or treated with E4 alone or in combination with P4 and/or E2.**

From left to right are presented MAP2 stained sections from pretreated (A) and treated (B) groups. In sections from the vehicle pretreated/treated animals was observed an existence of MAP2 negatively stained areas in the hippocampus and the cortex at the left, damaged side.

Scale bar: 2 mm.
